# Supplementary material for: Identification and bioinformatic characterization of a multidrug resistance associated protein (ABCC) gene in Plasmodium berghei
Source: Springer Nature journal article supplement (doi:10.1186/1475-2875-8-1), 2009-01-02
Supplement: Additional file 3 [file 1475-2875-8-1-s3.pdf]

pvMRP2 : ESDSCDIN IY NIMFV DTPFLIHF I SSMIDL CNMLIKFTI SFYMFYKMGREAVVNGLLIIFLYSLMFAFELASSLFFKIK : 435  
pfMRP2 : DKEVFTISIY NIMFIDTPFLIIFITALIELANMI IKFTIMSFYMFYKMGSAAVLNGALLIIMYGLMFAFESSLFFKIK : 457  
dInIY NIMF DTP LIyFIss I M IK iSFYMFY KMG Gi L lY f E SS K k

pbMRP : YLRYQDKRIDNMNHVLKEFKLMKMFNWEsIAFDYVNRERKELKYCKYRITLSSISNYINAIsvHcVEIvIFFVYIRNKL : 485  
pyMRP : YLRYQDKRIDNMNHVLKEFKLMKMFNWEsIAFDYVNRERKELKYCKYRITLSSISNYVNAISVHcVEIvIFFVYIKNKL : 473  
pkMRP : HLRCDRISRNMMHILKEFKLMKMFNWEsIAFDYVNRHRKKEMKVCITRIYLNSSNYINAIsmNVVEVAIFFIFIRGEL : 535  
pvMRP2 : HLRCDARISNMHHILKEFKLMKMFNWEsIAFDYVNRHRKKEMKFCITRIYLSISNYINNIsmNVVEVAIFFFFIKGEL : 515  
pfMRP2 : YLRYRDTRI SNMHHILKEFKLMKMFNWEsIAFDYVNRERIKEMKICKIRITLSSISNYVNNISVNIIVEVAIFFFYIRSEL : 537  
Lk D RI NM H LKEyKLMKMFNWEsIAFDYVN R KE K C RiYL SLSNY N IS VE IFF I L

pbMRP : NNDQIDVNSVITPLFVYKSLINGIVSEPTIFNNLEGPISNDRVNKYINNYFHDNISSKLFYSKIKNEKNSHLKKN-- : 563  
pyMRP : NNDHDIDVNSVITPLFVYKSLINGIVSEPTIFNNLEGPISNARVNKYVKNYFHDNISSKLFYSKIKNEKNSYFKKKN : 553  
pkMRP : NSNKPINVSIIITPLFVYKSLIAGMSNLPNIINNLLEGAINIGRINRYIEHYMFQ-----FDREDRNGYCTYRND : 605  
pvMRP2 : NSNKPINVSIIITPLFVYKSLIAGMSNFPNIINNLLEGAINIGRINKYIRYMF-----SEGSEAGGYDHRIGL : 585  
pfMRP2 : KSNKTVSFSLSITPLFVYKSLISGVSNEPNIINNLLEGAINIKRINKYINNYLFNNDMNDYFKNSLNGMKSITCNFQNGN : 617  
n N i v S I T P L F v Y K S L I G f P I N N L L E G I R N k y i h y n

pbMRP : -----NNNYMMQGGSEKIIPSKNTFYTSFLNMFSDDDYYSSN----- : 603  
pyMRP : NNSYISDKKNNNSYISGKNNNSYIFDKNNNYMMQGGSEEIIPPKNTFYTSFLNMISNDNYGYSYDDNDDNDDN : 633  
pkMRP : -----HKIGIQTCSTFGRHNMKMSNSNKHCDSSNWRSGFYKYFFFNKGYGMPGKGSNTNGYYYR : 665  
pvMRP2 : -----HPG---AAPAAGSGDRGGKRRNQHGEDPHWG-ALIKSIFFGKGYGKAGKARKAG-KAAS : 640  
pfMRP2 : -----TNNVNGYVDDYVDDYVDDYVDDYVNDYVNDYVDDYVDDYDMHMEYNININSKNGCSSKSRKNN : 677  
n y

pbMRP : ---YNDHGSNTTFEWEENENNKIYRNNSGDHINNKIIVTDIILNKN SKMNEINEGIKSKNILDEKYGIDKKTIIKLENCYY : 680  
pyMRP : NNDNNHGGNAANIEWESENKIIWRDNGDDNNSSEIVTDIILNKNKGKMKIKNSIKSQNIFDEKYGIDKNTIIKFENCNF : 713  
pkMRP : SEKGNDA LGGVVAEKVTGRLSGVSIGGGKGHQASDVILKMNGCYFSPDKSPTGKRHSRVDSNQ----- : 729  
pvMRP2 : GGSNRTHYGAARGGLAAGTAVEVAAGKEAAPPPEVILKLSGCYFSAEKPPSGGH DATGDATHQPNGQPN----- : 710  
pfMRP2 : KSFSKDHFSNHEQGTMQSFYKFLDTHKNKTKQKS DCKKKCSNNQLSKSNNNVVGE SNNSLFQDRKGWYPKNKHFKDNIV : 757  
h s

pbMRP : KPVK FEN-NYNQSKNMK LKNVFTLKNNTIAIITIGD I GSGETLFFNSILGKFLLN GNYYIKNFYIY-DMP LYAPQINWL : 758  
pyMRP : KPVK FEN-NYNQSKNIK LKNVFTLKNNTIAIITIGD I GSGKTLFFNSILGKFLLN GNYYIKNFYIY-DMP LYAPQINWL : 791  
pkMRP : -----TDAL LKNVNLTLKNNTLVVILGNVGSKTLFFNSLFGKLLSQNCYIKNFVH-DMP MYVPQFYWV : 795  
pvMRP2 : -----GQPLVPAAL LKNVNLTLRNNTLVVILGNVGSKTLFFNSLGLRLSRGSCYVKSEAN-DTP MYVPQFYWV : 781  
pfMRP2 : INMKNCYFSSKNNDDYI LKNINLTLKNNSVVIITLGNVGSKTIFFYSLGQFLSCGSFYLKNYIYKYPIIYVPQFNWI : 837  
LKNvN TLkNnt I G GSGkTlFFNs lG kL G Y Knf dmPv Y PQ W

\* 900 \* 920 \* 940 \* 960



k s e N s I

pbMRP : TYEMAKIKKDKQIRKYIGNFIVDTKGNNEMKCLKNK----- : 1224  
 pyMRP : TDEIAKIKKDEIRKYIGNFIINKKENNEIKCLKNK----- : 1264  
 pkMRP : SYAEVLIKKKEKNVEGVGNDRNRNRSFDEDD----- : 1300  
 pvMRP2 : NYAEVLVKKEK---SRTRGNSCSLSFEQDD----- : 1273  
 pfMRP2 : YHKFVMLKQFKTIYSFKTIYSFNTEETNDDEYNKTYRKYTKVIQNYDNHCLEGGKKSFRNYKSINSYNEILIKENMKVW : 1333

K

pbMRP : -----KTHINEFEETINAMKKNLKEHYTYYNNYIRYNSNNDTNIDVARKGNINFEETFRWYFRSISGNAILICTIIFIIF : 1297  
 pyMRP : -----KTDVEEFEKINAMKKNLKEHYTYYNNYIRDNSNNDTNKDVARKGNINFEETFKWYFKNVGNVILICTIIFIIF : 1337  
 pkMRP : -----KITLHEFEKVSQVLAQKLNQNYIIEYMGNEEDNGDEGESEELRFKGNINFEETFAWYLRMIGTPIIAVILFFMVI : 1373  
 pvMRP2 : -----KITLHEFEKVSQVLAQKLDNYMIEYLGNOENGDGEESEELRFKGNINFEETFWWYLRMIGNSLIAVILLFMIV : 1346  
 pfMRP2 : EDDTYYGNDYIDIEYEKIKKNVLSKLNKYNYYISCDYNSDHFDFN-EELKFKGNINFEETFWWYLLKTCRPLIIVIIIFMLL : 1412

k Efek l LK Y y n KGNik ETF WY iG I I F

pbMRP : SIFLDEIVKNNMLLFLVSAIKTKD-KSYEEIIQTKLVYLYYFIILPALSIVTIFISYMVIAHGIMISAKAIHTVFKSMLY : 1376  
 pyMRP : SIFLDEIKNNMLLFLVSAIKTKD-KSYEEIIQTKLVYLYYFIILPALSIVTIFISYMVIAHGIMISAKAIHTVFKSMLY : 1416  
 pkMRP : SIFTDEIKNNMLLFMASTIKSKG-QRESIEILEKQLVYMYWVFLPCVSLVTLTSEMLIAHGIAISAVVHTVFLMSILY : 1452  
 pvMRP2 : SIFTDEIKNNMLLFMASTIKSEEEQNDSIEILKQLVYLYYFVLLPCVSLVTLTSEMLIAHGIAISAVVHTVFLMSILY : 1426  
 pfMRP2 : SIFTDEIKNNLILFLASTIILKSGD-KKDEEILNQQLVYLYYFIILPALSIVTIFISYMVIAHGIVKSAIKVHTVFLLSILY : 1491

SIF DEiKNmlLF S l K EI LVYlkyF LLP SL Tt is M IAHG I sA k HTeV S Ly

pbMRP : APIPAFYSHNIGNIINRFITDHTLDNGI IKRCYKSEFTVSKFISTVILLIFMFKKTYIMLPFIIIVVYGFKKYSVAC : 1456  
 pyMRP : APIPAFYSHNIGNIINRFITDHTLDNGI IKRCYKTEFTISKFISTVILLIFMFKKTYIMLPFIIIVVYGFKKYSVAC : 1496  
 pkMRP : APIPAFYSNLGNIIINRFITDINVLDNGI IKRIYKTEYTFFRFLFTIYLLNYMVYQTIYVLPPIIFLIYVCVQRYSRGC : 1532  
 pvMRP2 : APIPAFYSNLGNIIINRFITDINVLDNGI IKRIYKTEYTFFRFLFTIYLLNYMVYQTIYVLPPIIFLIYVCVQRYSRGC : 1506  
 pfMRP2 : APIPAFYSNLGNIIINRFITDINVLDNGI IKRIYKSEYTLFRFLFTIYLLNYMVYQTIYVLPPIIFLIYFFVENKYSKGC : 1571

APIhAFYS N GNIINrFI Di LDNGI IKR YK F T F T LL M T P Ii Y F kYS C

pbMRP : KEAQRGYLCSHSPICSI FSNTHGKDIINLYKKNYCYLKKKFENS IYALRNFTLFWKGI TAWASLYIQLVSLCLTSFYIILY : 1536  
 pyMRP : KEAQRGYLCSHSPICSI FSNTHGKDIINLYKKNLDLILKKKFENS IYALRNFTLFWKGI TVWASLYIQLVSLCLTSFYIILY : 1576  
 pkMRP : KEAQRGYLSAHAPLCTIYSNTILGKEIILYLGKSKHFLDLYSKGVFNKYNYTIFWKCLTIWASLYVQLIVLCLTSFYIILY : 1612  
 pvMRP2 : KEAQRGYLSAHAPLCTIYSNTIMGKDIINLYKKNQHFLLDLYAKRVDFDKNYTIFWKCLTIWASLYVQLIVLCLTGFYIILY : 1586  
 pfMRP2 : KEAQRGFLASHAPLCTIYSNTIIGKDIINLYKKNYCYLTLKQKIFDFRNFTLFWKGI TAWASLYVQLIVLCLTGFYIILY : 1651

KEAQRGYL sH P C I SNTI GKdiInLYkKn L N T FKW T WASLY QL LcLT FYI Y

pbMRP : PHVFSIFKNSSEHIDIDVDYISYSEVIGYCFITFCSLGYTIKSFLLYDYTHVEKEMCSIQSLQELSKIKNISDETSFT-- : 1614  
 pyMRP : PHVFSIFKNSPEHIDIDVDYISYSEVIGYCFITFCSLGYTIKSFLLYDYTHVEKEMCSIQRLQELSKIKNINDEASAS-- : 1654

pkMRP : FVYVLEPYLGDK--KDPHFMEKKNANTIGYCFITFCSLGFVTKSLLYDYTHVEKEMCSTQRLEECSSQMFKEQVNYDD--- : 1687  
 pvMRP2 : FVYVLEPYLGDK--QDPNFMKEKNASTIGYCFITFCSLGFVTKALLYDYTHVEKEMCSTQRLEECSSQMINQVGYAD--- : 1661  
 pfMRP2 : P---HFFFKHA--KQDHEINYEKEASTIGYCFITFCSLGFVTKSLLYDYTHVEKEMCSTQRLEECSSKMIKDEGYSDDNIT : 1726  
 P d n IGYCFITFCSLGFVTKSLLYDYTHVEKEMCSTQRLEECSS

\* 1860 \* 1880 \* 1900 \* 1920  
 pbMRP : -----QIENHEYSYENNNKNVENANYLNNKTEDG : 1642  
 pyMRP : -----HVG-----HFENGKSKKFEKFEKGENVN : 1677  
 pkMRP : -----KEG-----MLPTQMLTMQTASTQVPVVKDT : 1712  
 pvMRP2 : -----EGGEAAKCGKGGPPPWEVVSREVPKEVSKVEVSTEVSTEVSKVEVLKVEVPKEVPLT : 1715  
 pfMRP2 : LQNNDPHTHEDNNNNNNNNNNEQDANLFKSVPGSYDPNDKENMRKYKTEIVNNTKDMYSIINKDDMLTHSINNKNLKLKLL : 1806

\* 1940 \* 1960 \* 1980 \* 2000  
 pbMRP : ILITPSQFPKSKYGLFVKVYVVSYYKKKVVYIDKLNKIYVYANEKSLRNINFYALKSCNIGIIGKSGAGKSTIVMAI LGLI : 1722  
 pyMRP : ALVSPTQLPQSKYGLFVKVYVVSYYKKKVVYIDKLNKIYVYANEKSLRNINFYALKSCNIGIIGKSGAGKSTIVMAI LGLI : 1757  
 pkMRP : PPMCAPENGKAKYGLHFEVFNVSYYKKKIFIDRSRNLVYVYANEKSLRNINLNYALKGCKIGIVGRSGAGKSTILSVLGLI : 1792  
 pvMRP2 : SPSKDVPCGKAKYGLHFEVFNVSYYKKKIFIDKSRNLVYVYANEKSLRNINNYALKGCKIGIVGRSGAGKSTILSVLGLI : 1795  
 pfMRP2 : YTSPHIDINKIKYGLFVKVYVVSYYKKKICVDRKNNKYVYVANEKSLRNINFYALKSCNIGIIGKSGAGKSTIVMAI LGLI : 1886  
 k KYGL F nV VSYKKK iD N YyYANEKSLRN N YALK Q IGI GkSGAGKST LGLI

\* 2020 \* 2040 \* 2060 \* 2080  
 pbMRP : STSKGEIKIDGRDIRSIPLENEKKKIIGILPQSSFFVSHWNIRTYIDPYQKFSDFNFIIDAFETIGINLTCADLNKYIYKTK : 1802  
 pyMRP : STSKGEIKIDGIDIKNIPTLDEKKKIIGILPQSSFFVSHWNIRTYIDPYHKFSDFNFIIDAFETIGINLTCADLNKYIYKTK : 1837  
 pkMRP : PTTTRGTISIEGRDIKMTLEERKNTIGLLPQSSFFVSHWNIRTYIDPYKNTFDNIMEAFKLIGINLQMEDLYKYIYKQK : 1872  
 pvMRP2 : PTTTRGTISIEGRDIKMTLSLEKRIIGLLPQSSFFVSHWNIRTYIDPYGSFSDDTIMEAFKLIGINLRKEDLYKYIYKQK : 1875  
 pfMRP2 : GTTRGRITIEGQDIKTLTLEDRKNMIGVLPQSSFFVSHWNIRTYIDPYKDFTDDEIVLAFKLIGINLSYDDLKYIYKQQ : 1966  
 T G I I G DIk L E K IG LPQSSFFVHWNIRTYIDPY F D eI dAF IGINL DL KYIYK k

\* 2100 \* 2120 \* 2140 \* 2160  
 pbMRP : KKN-----EYDKSKYTKTNKKYENNYILMSDLSIRYLSLVRITYLNRNRYKILLIDEIPVVFN-KNNSEFNNF : 1870  
 pyMRP : KKN-----EYHKSRYTKINKKNENNYILMSDLSIRYLSLVRITYLNRKRYKILLIDEIPVVFN-KNNSEINNF : 1906  
 pkMRP : KRAS---QDGRRVYNGRDKFDKSKSSSTVANSLSLSDCIRYLALVRIFLNRHNYKLVLIDEIPVLNLS-LSMSNTNNF : 1947  
 pvMRP2 : KKSASRDDRAGGLPNGADKQKGNSSSSAANFLAVSDCIRYLALVRIFLNRHNYKLVLIDEIPVLNLS-LSMSNANNF : 1954  
 pfMRP2 : RQQQ-----KKNKNTHNLWKKKSFIDLTSISLSDCIRYLSLVRILNRHNYKILLIDEIPVLFNC-YNTKKLTFN : 2038  
 k N SDD IRYL LVRi LNR YKL LIDEIPV N n ns nNF

\* 2180 \* 2200 \* 2220 \*  
 pbMRP : FTKNLKPFDYIIRNYFKHITVLIISHDTRTLSSCDFICVWSKGEIVYKCNYSDFVETQTLANITQDCAN- : 1939  
 pyMRP : FTKNLKPFDYIIRNYFKHITVLIISHDTRTLSSCDFICVWSKGEIVYKCNYSDFVETQTLANITQDCAN- : 1975  
 pkMRP : FSSDVKSFEYIIRNYFASHTVLIISHDTRTLSSCDFIYVWAKGEVSYKCSYSDIKTQAALAALIQKQTE- : 2016  
 pvMRP2 : FSSDVKSFEYIIRNYFAHITVLIISHDTRTLSSCDFIYVWAKGEVSYKCSYADIQTQAALAALIQKQTE- : 2023  
 pfMRP2 : FTTDIKSFYIIRNYFQNTVLIISHDTRTLSSCDFIYVWAKGEVSYKCSYKDVKTQTELANLLQEKQLN : 2108  
 F K F YII nyF hiTvLII HD TLS CDFI Vv KGEv YKc Y D TQ LA iQ q
